# Supplementary material
Source: Springer Nature journal article supplement (https://www.springermedizin.de/resource/supplementary/13256_2010_1531_MOESM3_ESM.pdf/9647882)

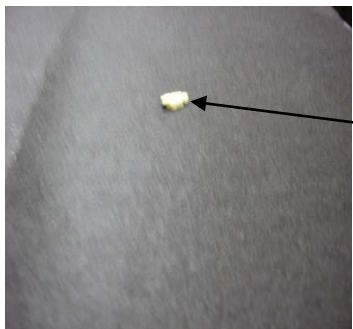

▼ Fish bone retrieved

Supplement: MOESM3 [file 9647882]
